# Supplementary material for: Global Analysis of the Impact of Environmental Perturbation on cis-Regulation of Gene Expression
Source: PLOS journal article supplement (doi:10.1371/journal.pgen.1001279), 2011-01-20
Supplement: S19 (10.1371/journal.pgen.1001279.s019) [file journal.pgen.1001279.s019]

## Sheet: TableS11
Probe ID	Gene ID	Chr	SNP ID	P (treatment*SNP)
ILMN_5066	CXCL10	chr4	rs3733236	3.17195e-59
ILMN_17824	CXCL11	chr4	rs3733236	1.57988e-49
ILMN_17824	CXCL11	chr4	rs3816248	4.15282e-49
ILMN_17824	CXCL11	chr4	rs10008834	5.32761e-49
ILMN_4628	MYH7	chr14	rs178637	1.35926e-46
ILMN_12602	CXCL9	chr4	rs3733236	6.91606e-44
ILMN_3636	TNNC1	chr3	rs740903	5.22222e-29
ILMN_138416	HOXD10	chr2	rs12471146	1.48891e-27
ILMN_3636	TNNC1	chr3	rs4687612	4.75643e-27
ILMN_138416	HOXD10	chr2	rs12476098	1.14316e-26
ILMN_7401	COCH	chr14	rs11624344	5.25617e-26
ILMN_3636	TNNC1	chr3	rs699469	6.71799e-26
ILMN_13970	RASGRP1	chr15	rs2172836	1.05253e-23
ILMN_14066	CAPN3	chr15	rs17767270	1.42858e-22
ILMN_14066	CAPN3	chr15	rs11630961	1.7485e-22
ILMN_7398	LOC285016	chr2	rs435733	2.01041e-22
ILMN_7398	LOC285016	chr2	rs385272	2.27819e-22
ILMN_7398	LOC285016	chr2	rs385909	3.45851e-22
ILMN_7398	LOC285016	chr2	rs409954	6.17058e-22
ILMN_7398	LOC285016	chr2	rs300711	6.17058e-22
ILMN_7398	LOC285016	chr2	rs440617	6.17058e-22
ILMN_7398	LOC285016	chr2	rs415660	9.37656e-22
ILMN_23999	TSGA2	chr21	rs228032	1.09798e-21
ILMN_8798	PPP1R12C	chr19	rs8112639	1.78818e-21
ILMN_931	GPR160	chr3	rs10804838	1.95684e-21
ILMN_1804	NEF3	chr8	rs4242416	2.4553e-21
ILMN_1804	NEF3	chr8	rs2979676	3.58039e-21
ILMN_16188	UNQ5783	chr17	rs6502844	5.0749e-20
ILMN_16188	UNQ5783	chr17	rs10445262	9.43345e-20
ILMN_7554	NEB	chr2	rs4536649	1.03792e-19
ILMN_7554	NEB	chr2	rs7426114	1.03792e-19
ILMN_7554	NEB	chr2	rs6712443	1.05009e-19
ILMN_16188	UNQ5783	chr17	rs2304445	1.12636e-19
ILMN_16188	UNQ5783	chr17	rs4790738	1.19155e-19
ILMN_16188	UNQ5783	chr17	rs12601694	1.20105e-19
ILMN_16188	UNQ5783	chr17	rs12948667	1.20105e-19
ILMN_28786	AURKAIP1	chr1	rs6685064	1.53316e-19
ILMN_16188	UNQ5783	chr17	rs452825	1.8035e-19
ILMN_11225	KCNS3	chr2	rs16984239	1.93558e-19
ILMN_21296	CYP24A1	chr20	rs6022842	2.24924e-19
ILMN_19035	TMC6	chr17	rs8073715	2.45424e-19
ILMN_12602	CXCL9	chr4	rs3816248	1.08979e-18
ILMN_12602	CXCL9	chr4	rs10008834	1.14465e-18
ILMN_775	CCDC64	chr12	rs10774538	5.12335e-17
ILMN_5201	RTP4	chr3	rs1107187	6.42687e-17
ILMN_775	CCDC64	chr12	rs3858716	8.71374e-17
ILMN_775	CCDC64	chr12	rs7295447	8.71374e-17
ILMN_775	CCDC64	chr12	rs7964822	8.71374e-17
ILMN_6524	AXUD1	chr3	rs3796127	2.68614e-16
ILMN_4782	HNRPH1	chr5	rs4701155	2.7931e-16
ILMN_6524	AXUD1	chr3	rs12635888	2.96725e-16
ILMN_6454	GPSN2	chr19	rs11670684	3.11441e-16
ILMN_27208	TIMD4	chr5	rs246879	4.25277e-16
ILMN_23999	TSGA2	chr21	rs11203200	6.07471e-16
ILMN_6524	AXUD1	chr3	rs11707101	6.41455e-16
ILMN_20370	GEM	chr8	rs2607060	6.48711e-16
ILMN_7411	KLF4	chr9	rs10739244	7.1267e-16
ILMN_20455	LGR5	chr12	rs11178927	2.12368e-15
ILMN_10908	REL	chr2	rs2698189	2.85575e-15
ILMN_21747	TMC8	chr17	rs8073715	6.15664e-15
ILMN_20455	LGR5	chr12	rs17110081	8.57825e-15
ILMN_12616	LRRN1	chr3	rs715882	9.61264e-15
ILMN_2690	MYH6	chr14	rs178637	1.12623e-14
ILMN_20394	SYPL1	chr7	rs17152528	1.49506e-14
ILMN_2708	NTNG1	chr1	rs6582999	4.44302e-14
ILMN_137754	HEM1	chr12	rs1691630	5.0285e-14
ILMN_10700	PGM5	chr9	rs11143002	6.19988e-14
ILMN_10700	PGM5	chr9	rs11143005	1.30676e-13
ILMN_26885	H3F3B	chr17	rs17581728	1.76797e-13
ILMN_22106	KIAA1622	chr14	rs1951017	2.22849e-13
ILMN_27653	GABRA5	chr15	rs10519583	2.25358e-13
ILMN_26885	H3F3B	chr17	rs12430	2.76945e-13
ILMN_3168	PTPRZ1	chr7	rs284395	2.81807e-13
ILMN_26885	H3F3B	chr17	rs1135889	3.39582e-13
ILMN_3168	PTPRZ1	chr7	rs284391	4.04519e-13
ILMN_11981	PSORS1C1	chr6	rs1619376	4.69793e-13
ILMN_11981	PSORS1C1	chr6	rs1634723	4.97882e-13
ILMN_20985	KIAA0773	chr7	rs6971222	5.35396e-13
ILMN_4972	HERC1	chr15	rs8031233	5.38741e-13
ILMN_20985	KIAA0773	chr7	rs6947788	5.86156e-13
ILMN_2941	TGIF	chr18	rs12455524	5.86867e-13
ILMN_4972	HERC1	chr15	rs8023466	7.75762e-13
ILMN_21415	CTRL	chr16	rs7202185	1.33033e-12
ILMN_26089	PI16	chr6	rs7740320	1.41404e-12
ILMN_3641	FLJ32312	chr2	rs2698189	1.78866e-12
ILMN_26089	PI16	chr6	rs9296204	1.82179e-12
ILMN_18741	ALF	chr2	rs2140551	1.9243e-12
ILMN_6468	ATF3	chr1	rs11119972	3.37033e-12
ILMN_6468	ATF3	chr1	rs678640	4.31923e-12
ILMN_20552	OBFC2B	chr12	rs7311008	4.38746e-12
ILMN_138156	RSAD2	chr2	rs771313	4.88079e-12
ILMN_136952	SORBS1	chr10	rs12359410	4.98119e-12
ILMN_138156	RSAD2	chr2	rs716896	5.22805e-12
ILMN_6468	ATF3	chr1	rs10779581	5.2527e-12
ILMN_20552	OBFC2B	chr12	rs12810816	6.70478e-12
ILMN_20552	OBFC2B	chr12	rs11171745	9.38383e-12
ILMN_20552	OBFC2B	chr12	rs773120	1.12116e-11
ILMN_17824	CXCL11	chr4	rs9307076	1.74663e-11
ILMN_2617	ZBTB32	chr19	rs10420134	1.7631e-11
ILMN_18270	OPCML	chr11	rs903818	1.82615e-11
ILMN_5128	ZNF238	chr1	rs11590416	2.4666e-11
ILMN_28637	MYRIP	chr3	rs17759069	2.74005e-11
ILMN_2466	KLF10	chr8	rs2248178	4.11253e-11
ILMN_6755	SEPW1	chr19	rs3815908	4.89229e-11
ILMN_21525	COL6A2	chr21	rs2839158	4.96376e-11
ILMN_7704	INDO	chr8	rs7822661	5.02397e-11
ILMN_17824	CXCL11	chr4	rs1554015	5.19066e-11
ILMN_22283	SLN	chr11	rs489243	5.2036e-11
ILMN_6755	SEPW1	chr19	rs10412203	5.47224e-11
ILMN_6755	SEPW1	chr19	rs12977319	5.47224e-11
ILMN_2466	KLF10	chr8	rs919953	5.80923e-11
ILMN_16419	MYBPC2	chr19	rs584975	6.34758e-11
ILMN_3648	LOC129607	chr2	rs1566982	6.49066e-11
ILMN_5055	PLEKHG1	chr6	rs742829	6.53467e-11
ILMN_1021	SHANK2	chr11	rs9651738	7.0874e-11
ILMN_20707	ZNF217	chr20	rs6022639	7.22337e-11
ILMN_22106	KIAA1622	chr14	rs17090908	7.34014e-11
ILMN_16419	MYBPC2	chr19	rs11881006	8.46984e-11
ILMN_21900	ZFAND2A	chr7	rs11772032	9.56995e-11
ILMN_12602	CXCL9	chr4	rs1554015	1.14608e-10
ILMN_10862	INPP5D	chr2	rs7570061	1.17202e-10
ILMN_138156	RSAD2	chr2	rs771323	1.36207e-10
ILMN_15504	SLAMF1	chr1	rs4656932	1.45598e-10
ILMN_28637	MYRIP	chr3	rs528949	1.6202e-10
ILMN_28637	MYRIP	chr3	rs1768152	1.8454e-10
ILMN_17824	CXCL11	chr4	rs1128864	1.87696e-10
ILMN_17824	CXCL11	chr4	rs14773	1.91347e-10
ILMN_29669	CHD7	chr8	rs11776511	1.9987e-10
ILMN_5066	CXCL10	chr4	rs3816248	2.25728e-10
ILMN_7335	TMEM109	chr11	rs175119	2.64873e-10
ILMN_3543	ARHGAP15	chr2	rs12613355	2.91464e-10
ILMN_5180	POU3F2	chr6	rs3823035	3.10325e-10
ILMN_12602	CXCL9	chr4	rs7685390	3.10919e-10
ILMN_12602	CXCL9	chr4	rs12499668	3.10919e-10
ILMN_5066	CXCL10	chr4	rs10008834	3.11793e-10
ILMN_5180	POU3F2	chr6	rs4407721	3.21869e-10
ILMN_137290	SRP9	chr1	rs1461957	3.30601e-10
ILMN_2423	ANKRD37	chr4	rs1288548	3.50129e-10
ILMN_2423	ANKRD37	chr4	rs13435845	3.90898e-10
ILMN_12602	CXCL9	chr4	rs7666094	4.12769e-10
ILMN_750	HOXD11	chr2	rs12471146	4.14191e-10
ILMN_7054	OAS2	chr12	rs4238032	4.40798e-10
ILMN_9659	EPHB3	chr3	rs12152460	4.67909e-10
ILMN_26971	NGEF	chr2	rs2004203	4.71147e-10
ILMN_9776	TNFSF14	chr19	rs2660489	5.42867e-10
ILMN_750	HOXD11	chr2	rs12476098	5.6807e-10
ILMN_20191	CA8	chr8	rs11776511	5.89028e-10
ILMN_692	HIST1H4E	chr6	rs12176317	6.6512e-10
ILMN_692	HIST1H4E	chr6	rs9379859	6.6512e-10
ILMN_692	HIST1H4E	chr6	rs9379858	7.46445e-10
ILMN_8093	ADPN	chr22	rs3761472	7.54282e-10
ILMN_3168	PTPRZ1	chr7	rs6946696	7.94608e-10
ILMN_17948	DES	chr2	rs885854	8.09036e-10
ILMN_3168	PTPRZ1	chr7	rs284387	8.93128e-10
ILMN_25964	MFNG	chr22	rs742152	9.38342e-10
ILMN_4787	PCDH20	chr13	rs7338363	9.6058e-10
ILMN_25339	GAA	chr17	rs1632673	9.71128e-10
ILMN_24353	ACTG1	chr17	rs14640	1.07839e-09
ILMN_17824	CXCL11	chr4	rs7685390	1.13407e-09
ILMN_17824	CXCL11	chr4	rs12499668	1.13407e-09
ILMN_19625	HSPBP1	chr19	rs8112639	1.16469e-09
ILMN_8093	ADPN	chr22	rs926633	1.21618e-09
ILMN_20095	SYTL2	chr11	rs485485	1.25617e-09
ILMN_8093	ADPN	chr22	rs1010023	1.37403e-09
ILMN_8093	ADPN	chr22	rs2896019	1.37403e-09
ILMN_9776	TNFSF14	chr19	rs332425	1.40839e-09
ILMN_17824	CXCL11	chr4	rs7666094	1.43518e-09
ILMN_5921	ABCG1	chr21	rs13340012	1.46621e-09
ILMN_16332	MX1	chr21	rs4816713	1.65429e-09
ILMN_537	TNNT1	chr19	rs12461856	1.73227e-09
ILMN_8451	MXRA7	chr17	rs7211963	1.88088e-09
ILMN_12199	CMYA1	chr3	rs3796127	1.8811e-09
ILMN_11918	ACOT2	chr14	rs17129430	2.04396e-09
ILMN_3168	PTPRZ1	chr7	rs2268076	2.27766e-09
ILMN_3168	PTPRZ1	chr7	rs2270884	2.35891e-09
ILMN_4787	PCDH20	chr13	rs9570486	2.37482e-09
ILMN_29440	VTCN1	chr1	rs6692981	2.46843e-09
ILMN_6301	NDUFB7	chr19	rs11670684	2.52005e-09
ILMN_21318	BHLHB5	chr8	rs10957312	2.57205e-09
ILMN_7995	RGS7	chr1	rs7540470	2.84007e-09
ILMN_12199	CMYA1	chr3	rs12635888	2.92248e-09
ILMN_5066	CXCL10	chr4	rs1554015	3.0156e-09
ILMN_20095	SYTL2	chr11	rs641393	3.11935e-09
ILMN_12199	CMYA1	chr3	rs11707101	3.15307e-09
ILMN_7995	RGS7	chr1	rs947307	3.70637e-09
ILMN_2929	EEF1A2	chr20	rs1151625	4.01931e-09
ILMN_2929	EEF1A2	chr20	rs2427536	4.01931e-09
ILMN_24804	KIAA0323	chr14	rs17184822	4.07906e-09
ILMN_18065	LOC144233	chr12	rs296742	4.11194e-09
ILMN_7295	ADAMTSL3	chr15	rs301849	4.50552e-09
ILMN_26366	FCGR2A	chr1	rs6427623	4.89202e-09
ILMN_635	KRTHB1	chr12	rs17718358	5.2529e-09
ILMN_11597	RIN3	chr14	rs3783932	5.85862e-09
ILMN_7059	NCAM1	chr11	rs598026	5.91429e-09
ILMN_5066	CXCL10	chr4	rs7685390	7.12709e-09
ILMN_5066	CXCL10	chr4	rs12499668	7.12709e-09
ILMN_11981	PSORS1C1	chr6	rs2517431	7.31956e-09
ILMN_7059	NCAM1	chr11	rs686503	8.28981e-09
ILMN_9563	POMZP3	chr7	rs17718122	8.32652e-09
ILMN_21318	BHLHB5	chr8	rs2218914	8.50518e-09
ILMN_6449	FBLN2	chr3	rs9838270	9.11747e-09
ILMN_5066	CXCL10	chr4	rs7666094	9.6745e-09
ILMN_3168	PTPRZ1	chr7	rs1158269	9.77093e-09
ILMN_11724	GULP1	chr2	rs1916961	9.84244e-09
ILMN_24804	KIAA0323	chr14	rs7159825	1.04284e-08
ILMN_21825	SERPINA9	chr14	rs4900244	1.08385e-08
ILMN_8451	MXRA7	chr17	rs8067445	1.11827e-08
ILMN_25103	C3orf63	chr3	rs9311603	1.17987e-08
ILMN_6836	SATB1	chr3	rs6762753	1.1864e-08
ILMN_6893	RNF180	chr5	rs13355554	1.18764e-08
ILMN_24934	ZBP1	chr20	rs6128046	1.18968e-08
ILMN_6836	SATB1	chr3	rs1475469	1.23204e-08
ILMN_24487	DOCK1	chr10	rs7079945	1.33522e-08
ILMN_3648	LOC129607	chr2	rs308007	1.35603e-08
ILMN_17548	IFI27	chr14	rs7161231	1.56155e-08
ILMN_21318	BHLHB5	chr8	rs4737681	1.83923e-08
ILMN_21318	BHLHB5	chr8	rs11992601	1.83923e-08
ILMN_21318	BHLHB5	chr8	rs11996540	1.83923e-08
ILMN_21318	BHLHB5	chr8	rs4480156	1.83923e-08
ILMN_21318	BHLHB5	chr8	rs716283	1.84089e-08
ILMN_6037	MRVI1	chr11	rs2232918	2.02749e-08
ILMN_6037	MRVI1	chr11	rs2232919	2.02749e-08
ILMN_6037	MRVI1	chr11	rs2687489	2.02749e-08
ILMN_24487	DOCK1	chr10	rs7904011	2.17637e-08
ILMN_8451	MXRA7	chr17	rs2240774	2.22005e-08
ILMN_12754	PPIL3	chr2	rs2348124	2.23642e-08
ILMN_28552	GAJ	chr4	rs11942354	2.38547e-08
ILMN_17130	F3	chr1	rs11584317	2.41755e-08
ILMN_26612	CA9	chr9	rs1339374	2.65568e-08
ILMN_3203	RASA4	chr7	rs12672177	2.84548e-08
ILMN_20095	SYTL2	chr11	rs580459	2.91709e-08
ILMN_17130	F3	chr1	rs11585025	3.0058e-08
ILMN_14495	FLJ10560	chr3	rs2377869	3.48337e-08
ILMN_14283	CBLN4	chr20	rs6092218	3.61592e-08
ILMN_534	MAPK13	chr6	rs17284939	3.6418e-08
ILMN_24518	KIAA1443	chr14	rs7150714	3.68246e-08
ILMN_3777	BIK	chr22	rs2076154	3.75355e-08
ILMN_22054	NEFL	chr8	rs2979676	3.84956e-08
ILMN_16114	FNBP1	chr9	rs7028995	3.93333e-08
ILMN_15689	OAS3	chr12	rs4238032	5.02179e-08
ILMN_11375	CEECAM1	chr9	rs6918	5.09458e-08
ILMN_18339	PLEKHA6	chr1	rs4531346	5.17432e-08
ILMN_15793	STRA6	chr15	rs2075589	5.25113e-08
ILMN_13295	TLE3	chr15	rs9646211	5.59348e-08
ILMN_10140	IFNB1	chr9	rs913931	5.65745e-08
ILMN_12275	KCNIP1	chr5	rs10042934	5.91833e-08
ILMN_7401	COCH	chr14	rs11621299	6.10225e-08
ILMN_1960	MAP1LC3C	chr1	rs7521516	6.23654e-08
ILMN_18339	PLEKHA6	chr1	rs17405517	6.30296e-08
ILMN_17252	IL10RA	chr11	rs7121851	6.41818e-08
ILMN_25543	ITPK1	chr14	rs3783932	6.77073e-08
ILMN_402	TRIP11	chr14	rs8006346	6.77545e-08
ILMN_8974	CKMT2	chr5	rs2114972	7.05718e-08
ILMN_10723	GAS6	chr13	rs7329468	7.77574e-08
ILMN_17221	FAM112B	chr12	rs17113238	8.22913e-08
ILMN_4735	OASL	chr12	rs2859400	8.30377e-08
ILMN_28349	SLC37A1	chr21	rs228032	8.34492e-08
ILMN_21763	C21orf56	chr21	rs2839158	9.24171e-08
ILMN_10615	XKR4	chr8	rs2658927	9.41298e-08
ILMN_2929	EEF1A2	chr20	rs6011002	1.01381e-07
ILMN_22093	HERC5	chr4	rs3733446	1.02476e-07
ILMN_15164	AQP9	chr15	rs2292711	1.04621e-07
ILMN_17221	FAM112B	chr12	rs4759089	1.05576e-07
ILMN_29103	DDX48	chr17	rs1632673	1.09818e-07
ILMN_137754	HEM1	chr12	rs4759089	1.13088e-07
ILMN_16419	MYBPC2	chr19	rs686912	1.13508e-07
ILMN_13295	TLE3	chr15	rs9745283	1.16449e-07
ILMN_137754	HEM1	chr12	rs17113238	1.19047e-07
ILMN_697	ADAMTSL2	chr9	rs10993865	1.32244e-07
ILMN_2717	OAS1	chr12	rs4238032	1.32571e-07
ILMN_2717	OAS1	chr12	rs4238032	1.32571e-07
ILMN_12602	CXCL9	chr4	rs9307076	1.32964e-07
ILMN_20695	FRAG1	chr11	rs727152	1.35177e-07
ILMN_11282	SEMA6A	chr5	rs1014643	1.35588e-07
ILMN_138156	RSAD2	chr2	rs1566982	1.35836e-07
ILMN_8451	MXRA7	chr17	rs11868472	1.36107e-07
ILMN_9292	RELN	chr7	rs2256504	1.36987e-07
ILMN_9292	RELN	chr7	rs2256670	1.36987e-07
ILMN_13295	TLE3	chr15	rs4777256	1.37603e-07
ILMN_12414	IRF4	chr6	rs4959923	1.41668e-07
ILMN_20722	MX2	chr21	rs2248865	1.4365e-07
ILMN_20095	SYTL2	chr11	rs1151152	1.46416e-07
ILMN_8521	MAP4K2	chr11	rs494252	1.54891e-07
ILMN_137508	NPPB	chr1	rs198358	1.55951e-07
ILMN_4200	TMEM16G	chr2	rs11674746	1.83218e-07
ILMN_15014	IGSF3	chr1	rs758518	1.90978e-07
ILMN_14283	CBLN4	chr20	rs16979159	1.92724e-07
ILMN_5578	TRIM61	chr4	rs4691168	1.95331e-07
ILMN_22054	NEFL	chr8	rs4242416	2.01004e-07
ILMN_21335	CCR7	chr17	rs16966294	2.03629e-07
ILMN_9397	SEC61A1	chr3	rs874546	2.17376e-07
ILMN_19499	PPAPDC1A	chr10	rs11199460	2.23183e-07
ILMN_3765	PAQR7	chr1	rs1257163	2.2882e-07
ILMN_27072	PLCG2	chr16	rs4611452	2.34787e-07
ILMN_136925	MGAT4B	chr5	rs4331859	2.35002e-07
ILMN_26508	FXYD6	chr11	rs11608153	2.35681e-07
ILMN_14162	LBX2	chr2	rs10779958	2.40227e-07
ILMN_12816	CGI-96	chr22	rs4822129	2.4154e-07
ILMN_137475	CNTNAP2	chr7	rs2074712	2.58457e-07
ILMN_20260	TMPRSS3	chr21	rs11203200	2.60884e-07
ILMN_13682	SHD	chr19	rs10402917	2.68803e-07
ILMN_7381	TXLNB	chr6	rs11964802	2.76689e-07
ILMN_9959	SGCD	chr5	rs10043401	2.89009e-07
ILMN_11225	KCNS3	chr2	rs1564010	2.89907e-07
ILMN_24707	JMJD2C	chr9	rs12378005	2.9346e-07
ILMN_18656	SLIT3	chr5	rs972031	2.97763e-07
ILMN_9397	SEC61A1	chr3	rs9877819	2.98267e-07
ILMN_27072	PLCG2	chr16	rs12921780	2.98663e-07
ILMN_8137	MYO18B	chr22	rs2285193	3.01568e-07
ILMN_27810	MTNR1B	chr11	rs1018206	3.03179e-07
ILMN_24707	JMJD2C	chr9	rs12006541	3.12575e-07
ILMN_19053	C13orf18	chr13	rs259699	3.245e-07
ILMN_24707	JMJD2C	chr9	rs10976233	3.26616e-07
ILMN_11754	CBFA2T3	chr16	rs3743979	3.28867e-07
ILMN_13682	SHD	chr19	rs10417405	3.47422e-07
ILMN_11981	PSORS1C1	chr6	rs7745906	3.57531e-07
ILMN_14162	LBX2	chr2	rs6707475	3.6349e-07
ILMN_24707	JMJD2C	chr9	rs7029264	3.73024e-07
ILMN_17221	FAM112B	chr12	rs4759088	3.73345e-07
ILMN_17376	PTK2B	chr8	rs17057419	3.91458e-07
ILMN_8756	GPATC3	chr1	rs3010110	3.93886e-07
ILMN_28124	MTPN	chr7	rs4732148	4.10783e-07
ILMN_24707	JMJD2C	chr9	rs10976239	4.11769e-07
ILMN_17221	FAM112B	chr12	rs12369172	4.11987e-07
ILMN_3053	UNC5B	chr10	rs9783254	4.13877e-07
ILMN_8756	GPATC3	chr1	rs3010107	4.36047e-07
ILMN_5602	KRT23	chr17	rs1859251	4.37573e-07
ILMN_27810	MTNR1B	chr11	rs599420	4.47904e-07
ILMN_9397	SEC61A1	chr3	rs11711692	4.5593e-07
ILMN_26456	SGCA	chr17	rs4793624	4.83779e-07
ILMN_29766	C12orf44	chr12	rs10876272	4.97249e-07
ILMN_697	ADAMTSL2	chr9	rs129886	5.11001e-07
ILMN_27810	MTNR1B	chr11	rs9971402	5.15374e-07
ILMN_25325	RGS18	chr1	rs1937235	5.2567e-07
ILMN_29766	C12orf44	chr12	rs949391	5.29614e-07
ILMN_11981	PSORS1C1	chr6	rs12179536	5.36883e-07
ILMN_138416	HOXD10	chr2	rs1867879	5.40034e-07
ILMN_7542	SGSH	chr17	rs1632673	5.4399e-07
ILMN_1395	PTPRR	chr12	rs685806	5.54975e-07
ILMN_20569	WISP3	chr6	rs17073644	5.56192e-07
ILMN_22297	PIP	chr7	rs10243382	5.64655e-07
ILMN_29766	C12orf44	chr12	rs10783507	5.68756e-07
ILMN_20095	SYTL2	chr11	rs652615	5.73548e-07
ILMN_6296	ACN9	chr7	rs2948240	5.769e-07
ILMN_12602	CXCL9	chr4	rs1128864	6.0215e-07
ILMN_20095	SYTL2	chr11	rs1893163	6.17503e-07
ILMN_22297	PIP	chr7	rs13438029	6.31037e-07
ILMN_22297	PIP	chr7	rs10256437	6.31037e-07
ILMN_14971	ASB5	chr4	rs2123861	6.33048e-07
ILMN_11225	KCNS3	chr2	rs12996816	6.46182e-07
ILMN_24021	CBLL1	chr7	rs10247487	6.71799e-07
ILMN_9397	SEC61A1	chr3	rs10512700	6.81369e-07
ILMN_26119	RGS2	chr1	rs10801165	7.28525e-07
ILMN_9771	GPIAP1	chr11	rs1267466	7.33147e-07
ILMN_17128	TFAP2A	chr6	rs17554922	7.34749e-07
ILMN_17128	TFAP2A	chr6	rs17625252	7.34749e-07
ILMN_12602	CXCL9	chr4	rs14773	7.57549e-07
ILMN_13302	C21orf6	chr21	rs8133819	7.64066e-07
ILMN_22297	PIP	chr7	rs10279637	7.69438e-07
ILMN_22544	GLCCI1	chr7	rs2215890	7.95543e-07
ILMN_137475	CNTNAP2	chr7	rs10487690	8.06043e-07
ILMN_138156	RSAD2	chr2	rs308007	8.12621e-07
ILMN_18339	PLEKHA6	chr1	rs4265490	8.20555e-07
ILMN_20095	SYTL2	chr11	rs667275	8.37341e-07
ILMN_12926	PARP9	chr3	rs7611002	8.39973e-07
ILMN_12926	PARP9	chr3	rs7652006	8.39973e-07
ILMN_28750	CA2	chr8	rs443177	8.50209e-07
ILMN_20151	LMCD1	chr3	rs11713611	8.53589e-07
ILMN_14066	CAPN3	chr15	rs11639355	8.70247e-07
ILMN_20151	LMCD1	chr3	rs17297803	8.75883e-07
ILMN_26119	RGS2	chr1	rs6701258	8.86352e-07
ILMN_2542	C3orf40	chr3	rs9647371	8.92737e-07
ILMN_23396	EBI3	chr19	rs350844	8.99737e-07
ILMN_27356	C14orf101	chr14	rs6573103	9.15872e-07
ILMN_28637	MYRIP	chr3	rs4352320	9.22184e-07
ILMN_665	WBP4	chr13	rs17532490	9.46642e-07
ILMN_16565	VNN2	chr6	rs9375896	9.57934e-07
ILMN_137754	HEM1	chr12	rs4759088	9.70878e-07
ILMN_23396	EBI3	chr19	rs350852	9.8755e-07
ILMN_23396	EBI3	chr19	rs4807546	9.8755e-07
ILMN_137754	HEM1	chr12	rs12369172	1.01459e-06
ILMN_2509	FSTL5	chr4	rs17638339	1.02383e-06
ILMN_139250	CDCA7	chr2	rs1465874	1.02978e-06
ILMN_20095	SYTL2	chr11	rs520629	1.03243e-06
ILMN_20095	SYTL2	chr11	rs510948	1.03243e-06
ILMN_25325	RGS18	chr1	rs4077238	1.03702e-06
ILMN_15875	MYB	chr6	rs13192235	1.03939e-06
ILMN_23396	EBI3	chr19	rs3760905	1.04527e-06
ILMN_20352	PCSK6	chr15	rs1542808	1.09854e-06
ILMN_17128	TFAP2A	chr6	rs4710891	1.13841e-06
ILMN_27832	MYO6	chr6	rs9350593	1.17304e-06
ILMN_3307	BATF	chr14	rs2242618	1.1922e-06
ILMN_28750	CA2	chr8	rs663323	1.20476e-06
ILMN_17824	CXCL11	chr4	rs4859571	1.2897e-06
ILMN_30024	TSC2	chr16	rs10500323	1.29574e-06
ILMN_22333	WFDC3	chr20	rs6073862	1.30801e-06
ILMN_5921	ABCG1	chr21	rs220137	1.34542e-06
ILMN_30024	TSC2	chr16	rs1657125	1.38256e-06
ILMN_12943	TMEM98	chr17	rs9911256	1.42234e-06
ILMN_28604	ZCCHC3	chr20	rs6032887	1.42938e-06
ILMN_27832	MYO6	chr6	rs6918870	1.43565e-06
ILMN_27832	MYO6	chr6	rs646967	1.43565e-06
ILMN_23129	CCDC52	chr3	rs1567778	1.46268e-06
ILMN_3767	STXBP5	chr6	rs17387507	1.50193e-06
ILMN_24615	SEMA4D	chr9	rs10908907	1.505e-06
ILMN_26082	KCND2	chr7	rs6466745	1.50829e-06
ILMN_10615	XKR4	chr8	rs2658915	1.52736e-06
ILMN_137508	NPPB	chr1	rs9614	1.55615e-06
ILMN_28750	CA2	chr8	rs2172494	1.55874e-06
ILMN_6602	BNIP1	chr5	rs3797456	1.56739e-06
ILMN_26082	KCND2	chr7	rs12531042	1.5745e-06
ILMN_20352	PCSK6	chr15	rs4965843	1.59133e-06
ILMN_4144	C14orf124	chr14	rs7159825	1.60401e-06
ILMN_26119	RGS2	chr1	rs7415619	1.60771e-06
ILMN_28349	SLC37A1	chr21	rs11203200	1.65922e-06
ILMN_27832	MYO6	chr6	rs3798461	1.66771e-06
ILMN_10385	ARTS-1	chr5	rs13160562	1.67484e-06
ILMN_21740	AKR1C1	chr10	rs4146653	1.67715e-06
ILMN_12275	KCNIP1	chr5	rs11134624	1.71154e-06
ILMN_12275	KCNIP1	chr5	rs906362	1.71154e-06
ILMN_26082	KCND2	chr7	rs7796685	1.7314e-06
ILMN_20095	SYTL2	chr11	rs2467059	1.73629e-06
ILMN_6950	SGNE1	chr15	rs7161975	1.81119e-06
ILMN_28750	CA2	chr8	rs11777530	1.83981e-06
ILMN_20095	SYTL2	chr11	rs11607789	1.84343e-06
ILMN_8747	TMEM55B	chr14	rs11701	1.84417e-06
ILMN_21964	PIM1	chr6	rs11961047	1.89298e-06
ILMN_21964	PIM1	chr6	rs12210148	1.89298e-06
ILMN_4029	PSMD3	chr17	rs3934886	1.9421e-06
ILMN_14770	SMOX	chr20	rs7266768	1.96505e-06
ILMN_4348	AUTS2	chr7	rs12698910	1.983e-06
ILMN_24463	PTGIS	chr20	rs678634	1.98601e-06
ILMN_29046	KCNAB1	chr3	rs940050	1.99362e-06
ILMN_9563	POMZP3	chr7	rs1754183	2.01811e-06
ILMN_25325	RGS18	chr1	rs5019664	2.01824e-06
ILMN_4898	CRLF1	chr19	rs888663	2.03922e-06
ILMN_23642	TLR2	chr4	rs1339	2.09021e-06
ILMN_23642	TLR2	chr4	rs2124641	2.09021e-06
ILMN_24099	EYA4	chr6	rs6908361	2.09661e-06
ILMN_19896	BLR1	chr11	rs4499035	2.11156e-06
ILMN_18803	LOC347273	chr9	rs7865385	2.22446e-06
ILMN_12414	IRF4	chr6	rs4959609	2.22704e-06
ILMN_22333	WFDC3	chr20	rs6065851	2.25081e-06
ILMN_28750	CA2	chr8	rs1021457	2.29551e-06
ILMN_23642	TLR2	chr4	rs4696491	2.30761e-06
ILMN_23642	TLR2	chr4	rs1530105	2.35905e-06
ILMN_25072	CBX5	chr12	rs1691630	2.41679e-06
ILMN_22333	WFDC3	chr20	rs1013562	2.41816e-06
ILMN_22333	WFDC3	chr20	rs6073846	2.41816e-06
ILMN_29138	OR7D2	chr19	rs10415904	2.43521e-06
ILMN_22847	RNASE1	chr14	rs1243645	2.474e-06
ILMN_20519	TMEM65	chr8	rs6988185	2.48963e-06
ILMN_20519	TMEM65	chr8	rs7837991	2.48963e-06
ILMN_17607	PPME1	chr11	rs11236116	2.51754e-06
ILMN_19346	RAD23B	chr9	rs10739244	2.58505e-06
ILMN_9959	SGCD	chr5	rs6877490	2.6016e-06
ILMN_3259	PPM1K	chr4	rs3733446	2.64533e-06
ILMN_8093	ADPN	chr22	rs2076211	2.67282e-06
ILMN_1552	DGCR8	chr22	rs2073778	2.69591e-06
ILMN_1552	DGCR8	chr22	rs2238798	2.69591e-06
ILMN_1552	DGCR8	chr22	rs5992507	2.69591e-06
ILMN_1552	DGCR8	chr22	rs3804044	2.69591e-06
ILMN_29766	C12orf44	chr12	rs2857671	2.70044e-06
ILMN_9671	DPYSL2	chr8	rs1122215	2.72188e-06
ILMN_2123	RCC2	chr1	rs2977295	2.74455e-06
ILMN_2489	CHAC1	chr15	rs8038834	2.78202e-06
ILMN_2489	CHAC1	chr15	rs1971131	2.78202e-06
ILMN_18339	PLEKHA6	chr1	rs17334002	2.82068e-06
ILMN_18339	PLEKHA6	chr1	rs17405926	2.82068e-06
ILMN_4144	C14orf124	chr14	rs17184822	2.82972e-06
ILMN_26913	SSBP3	chr1	rs1999175	2.85567e-06
ILMN_9543	HBD	chr11	rs10768545	2.85811e-06
ILMN_24099	EYA4	chr6	rs6569863	2.89038e-06
ILMN_10700	PGM5	chr9	rs1014237	2.89468e-06
ILMN_29986	PTGS2	chr1	rs12760232	2.90693e-06
ILMN_5180	POU3F2	chr6	rs2444932	2.95647e-06
ILMN_25072	CBX5	chr12	rs2706254	2.99408e-06
ILMN_8387	C6orf15	chr6	rs6917517	3.04839e-06
ILMN_15414	CDCP1	chr3	rs11918392	3.0551e-06
ILMN_24085	PRKCA	chr17	rs1476813	3.06329e-06
ILMN_2381	FOLR3	chr11	rs11235468	3.1092e-06
ILMN_25241	MLKL	chr16	rs7194143	3.12215e-06
ILMN_9671	DPYSL2	chr8	rs1465939	3.13392e-06
ILMN_9671	DPYSL2	chr8	rs1465941	3.13392e-06
ILMN_9671	DPYSL2	chr8	rs3922658	3.13392e-06
ILMN_138968	SDCCAG33	chr18	rs12458682	3.13502e-06
ILMN_28657	TMEM50A	chr1	rs742391	3.14529e-06
ILMN_4348	AUTS2	chr7	rs10486877	3.17961e-06
ILMN_4348	AUTS2	chr7	rs17488553	3.17961e-06
ILMN_17259	NALP2	chr19	rs890869	3.18346e-06
ILMN_20260	TMPRSS3	chr21	rs225319	3.19061e-06
ILMN_25325	RGS18	chr1	rs1416490	3.20132e-06
ILMN_7335	TMEM109	chr11	rs656736	3.20637e-06
ILMN_23642	TLR2	chr4	rs12643219	3.25792e-06
ILMN_8339	CCL1	chr17	rs7217519	3.27713e-06
ILMN_19491	SAMD12	chr8	rs17683196	3.31871e-06
ILMN_4200	TMEM16G	chr2	rs4675991	3.36377e-06
ILMN_9671	DPYSL2	chr8	rs1122214	3.3651e-06
ILMN_26960	HMX2	chr10	rs7917777	3.36699e-06
ILMN_3767	STXBP5	chr6	rs2050184	3.38907e-06
ILMN_4200	TMEM16G	chr2	rs6710177	3.41055e-06
ILMN_29046	KCNAB1	chr3	rs11708859	3.44845e-06
ILMN_3767	STXBP5	chr6	rs10484687	3.45226e-06
ILMN_20095	SYTL2	chr11	rs1237203	3.49786e-06
ILMN_20394	SYPL1	chr7	rs17289756	3.51839e-06
ILMN_3543	ARHGAP15	chr2	rs787151	3.57314e-06
ILMN_138968	SDCCAG33	chr18	rs4891065	3.59801e-06
ILMN_4133	CSMD2	chr1	rs483083	3.59964e-06
ILMN_16214	MMP11	chr22	rs9624216	3.61888e-06
ILMN_18339	PLEKHA6	chr1	rs17333933	3.64684e-06
ILMN_13310	ATF7	chr12	rs4759286	3.6962e-06
ILMN_12192	OR1B1	chr9	rs1831369	3.70032e-06
ILMN_12192	OR1B1	chr9	rs2416872	3.70032e-06
ILMN_12192	OR1B1	chr9	rs3983868	3.70032e-06
ILMN_3543	ARHGAP15	chr2	rs10496954	3.70455e-06
ILMN_1295	CHI3L2	chr1	rs7512322	3.75911e-06
ILMN_1295	CHI3L2	chr1	rs6702380	3.75911e-06
ILMN_16669	HSP90AA1	chr14	rs8003511	3.7974e-06
ILMN_25947	FLII	chr17	rs741783	3.85693e-06
ILMN_10713	CECR1	chr22	rs5992046	3.87222e-06
ILMN_4348	AUTS2	chr7	rs11762478	3.92219e-06
ILMN_17550	ZNF22	chr10	rs2487504	3.92293e-06
ILMN_28480	FLJ40722	chr7	rs7795347	3.98022e-06
ILMN_137475	CNTNAP2	chr7	rs6464816	3.99175e-06
ILMN_15940	MGC33839	chr19	rs3826663	4.05026e-06
ILMN_25078	DHRS9	chr2	rs17267869	4.05583e-06
ILMN_692	HIST1H4E	chr6	rs1979	4.11059e-06
ILMN_10713	CECR1	chr22	rs9605254	4.15657e-06
ILMN_27348	C1orf166	chr1	rs11800772	4.16212e-06
ILMN_138217	RBAF600	chr1	rs10158092	4.17519e-06
ILMN_23560	PCDHB8	chr5	rs3776105	4.27389e-06
ILMN_138759	CSEN	chr2	rs10874471	4.28096e-06
ILMN_27832	MYO6	chr6	rs9350591	4.30521e-06
ILMN_12196	SH2D3C	chr9	rs4837192	4.43356e-06
ILMN_9209	KRT14	chr17	rs11551759	4.48519e-06
ILMN_5921	ABCG1	chr21	rs11203200	4.52628e-06
ILMN_6728	FOXC2	chr16	rs299924	4.69151e-06
ILMN_24615	SEMA4D	chr9	rs3211663	4.69986e-06
ILMN_5678	R7BP	chr5	rs6859057	4.74265e-06
ILMN_11981	PSORS1C1	chr6	rs9461680	4.74316e-06
ILMN_13011	TMEM16B	chr12	rs11063674	4.79395e-06
ILMN_28480	FLJ40722	chr7	rs6971999	4.95554e-06
ILMN_10385	ARTS-1	chr5	rs28096	5.01879e-06
ILMN_6906	KIAA0863	chr18	rs9675571	5.05633e-06
ILMN_1616	FAM48A	chr13	rs9603096	5.07911e-06
ILMN_5180	POU3F2	chr6	rs9493282	5.14645e-06
ILMN_23523	FREQ	chr9	rs1342043	5.14734e-06
ILMN_24737	NRBP1	chr2	rs780092	5.20048e-06
ILMN_11008	SUSD3	chr9	rs10821077	5.54274e-06
ILMN_20095	SYTL2	chr11	rs188311	5.55903e-06
ILMN_20700	DUSP1	chr5	rs2112661	5.57193e-06
ILMN_14066	CAPN3	chr15	rs12440118	5.57671e-06
ILMN_9397	SEC61A1	chr3	rs2217628	5.68282e-06
ILMN_4658	MTUS1	chr8	rs3862079	5.76016e-06
ILMN_29766	C12orf44	chr12	rs4761861	5.78906e-06
ILMN_23814	C2orf33	chr2	rs12694728	5.85425e-06
ILMN_2929	EEF1A2	chr20	rs1291211	5.87926e-06
ILMN_20700	DUSP1	chr5	rs17075181	5.91011e-06
ILMN_13682	SHD	chr19	rs10402864	5.92e-06
ILMN_7827	SELP	chr1	rs6131	5.92089e-06
ILMN_138416	HOXD10	chr2	rs9808514	5.92728e-06
ILMN_6640	KCNJ2	chr17	rs236578	6.03265e-06
ILMN_29118	HIST1H3G	chr6	rs9467715	6.03749e-06
ILMN_8269	BCAS1	chr20	rs4811479	6.04228e-06
ILMN_23560	PCDHB8	chr5	rs4151693	6.10361e-06
ILMN_5678	R7BP	chr5	rs4432837	6.12445e-06
ILMN_14312	ACYP2	chr2	rs11678775	6.18644e-06
ILMN_15940	MGC33839	chr19	rs8111906	6.21567e-06
ILMN_26252	TRAM2	chr6	rs9474230	6.2158e-06
ILMN_10219	C22orf5	chr22	rs135721	6.25025e-06
ILMN_22971	RFX5	chr1	rs2769264	6.25049e-06
ILMN_17824	CXCL11	chr4	rs17001561	6.33592e-06
ILMN_29995	HDAC7A	chr12	rs1233055	6.37468e-06
ILMN_25048	ELAVL3	chr19	rs206863	6.37744e-06
ILMN_25048	ELAVL3	chr19	rs286300	6.37744e-06
ILMN_19091	OR1L8	chr9	rs1831369	6.46706e-06
ILMN_19091	OR1L8	chr9	rs2416872	6.46706e-06
ILMN_19091	OR1L8	chr9	rs3983868	6.46706e-06
ILMN_14066	CAPN3	chr15	rs11636209	6.53135e-06
ILMN_19381	MSR1	chr8	rs1385290	6.62286e-06
ILMN_1804	NEF3	chr8	rs11994014	6.64354e-06
ILMN_10713	CECR1	chr22	rs17808076	6.73704e-06
ILMN_20095	SYTL2	chr11	rs290193	6.84964e-06
ILMN_23560	PCDHB8	chr5	rs7722330	6.88782e-06
ILMN_22778	SEMA4G	chr10	rs12358230	6.95543e-06
ILMN_22122	MGC16028	chr14	rs7151939	7.02871e-06
ILMN_29995	HDAC7A	chr12	rs948394	7.10176e-06
ILMN_27521	APOL4	chr22	rs7286844	7.12495e-06
ILMN_4658	MTUS1	chr8	rs13256095	7.16529e-06
ILMN_11933	C9orf6	chr9	rs838826	7.35347e-06
ILMN_27273	FBLN1	chr22	rs9614734	7.36411e-06
ILMN_20455	LGR5	chr12	rs10506628	7.44433e-06
ILMN_18803	LOC347273	chr9	rs17742650	7.44814e-06
ILMN_6991	MANEA	chr6	rs6568636	7.49299e-06
ILMN_24208	PON1	chr7	rs2299262	7.55833e-06
ILMN_8157	ERBB3	chr12	rs12580100	7.62462e-06
ILMN_13343	NRG3	chr10	rs1333208	7.68249e-06
ILMN_138759	CSEN	chr2	rs6577012	7.73367e-06
ILMN_13503	YARS	chr1	rs359955	7.736e-06
ILMN_12920	CD48	chr1	rs4656932	7.7376e-06
ILMN_10349	NEK11	chr3	rs1913251	7.80904e-06
ILMN_9292	RELN	chr7	rs12705150	8.07827e-06
ILMN_25637	PMAIP1	chr18	rs952785	8.19265e-06
ILMN_137859	PAP2	chr1	rs12138303	8.26912e-06
ILMN_24021	CBLL1	chr7	rs10263826	8.2745e-06
ILMN_2708	NTNG1	chr1	rs10494066	8.31071e-06
ILMN_20964	C16orf45	chr16	rs7404843	8.34135e-06
ILMN_14641	MTAC2D1	chr14	rs2430340	8.36383e-06
ILMN_21645	EMCN	chr4	rs6848407	8.41139e-06
ILMN_26123	EVI1	chr3	rs9290352	8.47487e-06
ILMN_13177	SASS6	chr1	rs2012797	8.50796e-06
ILMN_7313	OXTR	chr3	rs6798626	8.51904e-06
ILMN_10544	P2RX5	chr17	rs401643	8.51931e-06
ILMN_4331	UBE2G1	chr17	rs8076142	8.52044e-06
ILMN_10938	RPS14	chr5	rs252161	8.63919e-06
ILMN_2886	NAPRT1	chr8	rs1077272	8.65838e-06
ILMN_2886	NAPRT1	chr8	rs2382954	8.65838e-06
ILMN_2886	NAPRT1	chr8	rs964196	8.65838e-06
ILMN_2886	NAPRT1	chr8	rs3750208	8.65838e-06
ILMN_1159	BAI3	chr6	rs7741993	8.67766e-06
ILMN_28657	TMEM50A	chr1	rs742393	8.68976e-06
ILMN_9906	TBX20	chr7	rs1992806	8.74803e-06
ILMN_11674	CASP6	chr4	rs2024111	8.76983e-06
ILMN_9155	RPL7L1	chr6	rs12202031	8.88145e-06
ILMN_21885	B3GALT6	chr1	rs6685064	8.95931e-06
ILMN_4882	THBS1	chr15	rs10152903	8.99145e-06
ILMN_6283	FLVCR	chr1	rs12567728	9.0345e-06
ILMN_15148	MS4A7	chr11	rs10792269	9.08489e-06
ILMN_19053	C13orf18	chr13	rs912403	9.10815e-06
ILMN_12199	CMYA1	chr3	rs4075734	9.15966e-06
ILMN_8380	CTDP1	chr18	rs8090560	9.16871e-06
ILMN_138759	CSEN	chr2	rs11897976	9.28415e-06
ILMN_17824	CXCL11	chr4	rs2271528	9.47506e-06
ILMN_14424	HLA-DMA	chr6	rs9357155	9.56673e-06
ILMN_9563	POMZP3	chr7	rs2286428	9.59599e-06
ILMN_28637	MYRIP	chr3	rs13091037	9.62078e-06
ILMN_28637	MYRIP	chr3	rs4234142	9.62078e-06
ILMN_7401	COCH	chr14	rs3736742	9.65992e-06
ILMN_4658	MTUS1	chr8	rs3862080	9.7293e-06
ILMN_4658	MTUS1	chr8	rs17632963	9.7293e-06
ILMN_13255	RTP2	chr3	rs2600999	9.7357e-06
ILMN_10385	ARTS-1	chr5	rs1862609	9.76909e-06
ILMN_24188	DIRAS2	chr9	rs4744498	9.78771e-06
ILMN_10385	ARTS-1	chr5	rs10037212	9.85749e-06
ILMN_11008	SUSD3	chr9	rs12003264	9.86147e-06
ILMN_18339	PLEKHA6	chr1	rs12023102	1.00026e-05
ILMN_17479	TAP1	chr6	rs9357155	1.00221e-05
ILMN_11993	ZNF410	chr14	rs17129430	1.01034e-05
ILMN_27521	APOL4	chr22	rs6000120	1.01901e-05
ILMN_15732	COL15A1	chr9	rs10988495	1.03851e-05
ILMN_29669	CHD7	chr8	rs4289856	1.0481e-05
ILMN_3180	NR4A1	chr12	rs11612312	1.0503e-05
ILMN_3180	NR4A1	chr12	rs11612312	1.0503e-05
ILMN_3871	BNIP3	chr10	rs9419329	1.07114e-05
ILMN_2233	LPL	chr8	rs7823121	1.07402e-05
ILMN_3588	GPAM	chr10	rs12412743	1.09376e-05
ILMN_7701	NSMAF	chr8	rs2726585	1.10124e-05
ILMN_17824	CXCL11	chr4	rs1857821	1.12714e-05
ILMN_13310	ATF7	chr12	rs7307804	1.15726e-05
ILMN_9900	CDC34	chr19	rs2392794	1.17288e-05
ILMN_19983	TNFSF7	chr19	rs2660489	1.18159e-05
ILMN_6640	KCNJ2	chr17	rs12601653	1.18314e-05
ILMN_1167	NDUFS4	chr5	rs10491444	1.18465e-05
ILMN_28642	CNDP1	chr18	rs12961730	1.1978e-05
ILMN_26252	TRAM2	chr6	rs12193402	1.20003e-05
ILMN_8678	TTLL7	chr1	rs575633	1.20484e-05
ILMN_22247	ZNF425	chr7	rs2888566	1.22464e-05
ILMN_14304	CLDN23	chr8	rs11249895	1.23245e-05
ILMN_14466	SERPINB2	chr18	rs724558	1.23403e-05
ILMN_12926	PARP9	chr3	rs4678200	1.25226e-05
ILMN_9397	SEC61A1	chr3	rs9883958	1.27247e-05
ILMN_13255	RTP2	chr3	rs1452190	1.27387e-05
ILMN_19983	TNFSF7	chr19	rs332425	1.27726e-05
ILMN_18065	LOC144233	chr12	rs3741559	1.29601e-05
ILMN_13120	MGC59937	chr9	rs17578859	1.30715e-05
ILMN_19053	C13orf18	chr13	rs9534381	1.30725e-05
ILMN_6233	C6orf192	chr6	rs17802221	1.31942e-05
ILMN_13053	MYOG	chr1	rs10753929	1.32448e-05
ILMN_23515	CHI3L1	chr1	rs6686206	1.34751e-05
ILMN_13255	RTP2	chr3	rs4254648	1.35869e-05
ILMN_13255	RTP2	chr3	rs9827569	1.35869e-05
ILMN_9777	UPB1	chr22	rs5751957	1.365e-05
ILMN_1945	SPTY2D1	chr11	rs12421865	1.37155e-05
ILMN_6283	FLVCR	chr1	rs3768548	1.38582e-05
ILMN_8451	MXRA7	chr17	rs2286586	1.39361e-05
ILMN_8451	MXRA7	chr17	rs2286587	1.39361e-05
ILMN_8451	MXRA7	chr17	rs7225592	1.39361e-05
ILMN_137208	EGFL8	chr6	rs3134603	1.3981e-05
ILMN_27109	TYROBP	chr19	rs3817624	1.4026e-05
ILMN_4029	PSMD3	chr17	rs9916782	1.40515e-05
ILMN_30353	SCCPDH	chr1	rs7417670	1.41771e-05
ILMN_14466	SERPINB2	chr18	rs2849305	1.41979e-05
ILMN_14060	HLF	chr17	rs7218159	1.43491e-05
ILMN_15027	PPP2R2B	chr5	rs4705117	1.43533e-05
ILMN_19840	TBC1D20	chr20	rs1535234	1.44645e-05
ILMN_16662	SREBF2	chr22	rs6519301	1.457e-05
ILMN_24350	NUMB	chr14	rs17129430	1.47902e-05
ILMN_4691	AP1S1	chr7	rs17319250	1.47992e-05
ILMN_4691	AP1S1	chr7	rs2072168	1.48497e-05
ILMN_23395	GLDC	chr9	rs12552845	1.48871e-05
ILMN_24462	GBP5	chr1	rs3806338	1.49147e-05
ILMN_19470	RFK	chr9	rs10869723	1.55297e-05
ILMN_26089	PI16	chr6	rs736348	1.5544e-05
ILMN_6283	FLVCR	chr1	rs12042181	1.56565e-05
ILMN_3289	LPP	chr3	rs11710948	1.56751e-05
ILMN_19364	MFAP5	chr12	rs10743549	1.58698e-05
ILMN_8180	NME4	chr16	rs11248914	1.59521e-05
ILMN_16935	DUS2L	chr16	rs12598	1.59837e-05
ILMN_23395	GLDC	chr9	rs12554718	1.60004e-05
ILMN_6283	FLVCR	chr1	rs3816954	1.60545e-05
ILMN_14646	CDCA7L	chr7	rs7790948	1.6083e-05
ILMN_20155	MXRA8	chr1	rs4970420	1.61208e-05
ILMN_25576	MRPL53	chr2	rs3771744	1.62674e-05
ILMN_30092	KIAA1944	chr12	rs1976829	1.64434e-05
ILMN_9563	POMZP3	chr7	rs804025	1.64483e-05
ILMN_2105	OTX1	chr2	rs12614162	1.64622e-05
ILMN_14466	SERPINB2	chr18	rs2613658	1.6661e-05
ILMN_138217	RBAF600	chr1	rs6698642	1.7153e-05
ILMN_139145	ALOX15B	chr17	rs8531	1.73552e-05
ILMN_137754	HEM1	chr12	rs2706254	1.7444e-05
ILMN_6283	FLVCR	chr1	rs1874420	1.77401e-05
ILMN_753	C9orf152	chr9	rs2418076	1.77641e-05
ILMN_13255	RTP2	chr3	rs2653312	1.78096e-05
ILMN_13255	RTP2	chr3	rs2653330	1.78096e-05
ILMN_8464	PPP1R10	chr6	rs2394401	1.79558e-05
ILMN_28881	CORIN	chr4	rs6813436	1.80799e-05
ILMN_2708	NTNG1	chr1	rs4244126	1.814e-05
ILMN_22933	NUP210	chr3	rs662634	1.83574e-05
ILMN_13310	ATF7	chr12	rs7310771	1.86396e-05
ILMN_27577	USPL1	chr13	rs169931	1.86484e-05
ILMN_7398	LOC285016	chr2	rs867926	1.87921e-05
ILMN_11754	CBFA2T3	chr16	rs4782449	1.87932e-05
ILMN_23999	TSGA2	chr21	rs225319	1.88017e-05
ILMN_9420	BAG3	chr10	rs3892879	1.90508e-05
ILMN_8256	CBR3	chr21	rs2212922	1.91383e-05
ILMN_21543	SORCS2	chr4	rs11737898	1.93898e-05
ILMN_16662	SREBF2	chr22	rs133335	1.95651e-05
ILMN_17824	CXCL11	chr4	rs12510869	1.96533e-05
ILMN_138576	KIAA1128	chr10	rs10887363	1.96662e-05
ILMN_138576	KIAA1128	chr10	rs17104078	1.96662e-05
ILMN_12602	CXCL9	chr4	rs12510869	1.98282e-05
ILMN_20675	GPR19	chr12	rs2270451	1.98604e-05
ILMN_28480	FLJ40722	chr7	rs722001	2.00386e-05
ILMN_7794	GTF3C4	chr9	rs944812	2.01197e-05
ILMN_10406	ZNF222	chr19	rs4802210	2.0308e-05
ILMN_8155	OCA2	chr15	rs17565175	2.0843e-05
ILMN_15799	BRI3BP	chr12	rs11058000	2.1067e-05
ILMN_14489	TMEM58	chr1	rs492563	2.11103e-05
ILMN_21599	KCNT1	chr9	rs872005	2.11766e-05
ILMN_8097	LOC90167	chrX	rs5933057	2.12529e-05
ILMN_14466	SERPINB2	chr18	rs8090046	2.13132e-05
ILMN_3221	CPT1C	chr19	rs10403127	2.13656e-05
ILMN_8098	HCST	chr19	rs10420134	2.14832e-05
ILMN_20901	KCNA4	chr11	rs3802914	2.17544e-05
ILMN_23560	PCDHB8	chr5	rs3776096	2.19779e-05
ILMN_9209	KRT14	chr17	rs1466260	2.21151e-05
ILMN_10478	SPRR3	chr1	rs10494291	2.2132e-05
ILMN_10478	SPRR3	chr1	rs10494292	2.2132e-05
ILMN_12602	CXCL9	chr4	rs17001561	2.22639e-05
ILMN_22879	ARHGAP9	chr12	rs1479498	2.22865e-05
ILMN_1387	STAMBPL1	chr10	rs11202900	2.23297e-05
ILMN_24737	NRBP1	chr2	rs1881396	2.23775e-05
ILMN_24737	NRBP1	chr2	rs3811644	2.23775e-05
ILMN_1387	STAMBPL1	chr10	rs4431933	2.24491e-05
ILMN_1387	STAMBPL1	chr10	rs2119685	2.24491e-05
ILMN_2279	SLC15A4	chr12	rs12423526	2.25613e-05
ILMN_8339	CCL1	chr17	rs12450373	2.26301e-05
ILMN_25947	FLII	chr17	rs2294914	2.26348e-05
ILMN_25947	FLII	chr17	rs2273026	2.26348e-05
ILMN_22095	WNT9B	chr17	rs16941569	2.27743e-05
ILMN_27172	GNAL	chr18	rs8099016	2.29585e-05
ILMN_6622	PTGER2	chr14	rs1390376	2.29958e-05
ILMN_27832	MYO6	chr6	rs1923586	2.31356e-05
ILMN_5007	CPEB4	chr5	rs1992906	2.34438e-05
ILMN_137229	MGC15763	chr3	rs690555	2.36064e-05
ILMN_22465	PTER	chr10	rs7909832	2.36554e-05
ILMN_137208	EGFL8	chr6	rs3134954	2.39295e-05
ILMN_1387	STAMBPL1	chr10	rs7915393	2.39991e-05
ILMN_23486	SNF1LK	chr21	rs914195	2.40009e-05
ILMN_25118	WFDC9	chr20	rs4812893	2.41773e-05
ILMN_137057	NRCAM	chr7	rs1636961	2.43762e-05
ILMN_2708	NTNG1	chr1	rs542152	2.44464e-05
ILMN_18784	PLEKHA3	chr2	rs6706354	2.45996e-05
ILMN_3927	C9orf66	chr9	rs540909	2.46431e-05
ILMN_29578	DHFRL1	chr3	rs1007368	2.51373e-05
ILMN_29578	DHFRL1	chr3	rs1584930	2.51373e-05
ILMN_2051	ZNF681	chr19	rs10518280	2.52539e-05
ILMN_5192	IL17D	chr13	rs2497497	2.55361e-05
ILMN_5192	IL17D	chr13	rs7995035	2.55361e-05
ILMN_5192	IL17D	chr13	rs7998003	2.55361e-05
ILMN_26598	B4GALNT3	chr12	rs4980841	2.57125e-05
ILMN_1300	MMP3	chr11	rs2408490	2.57818e-05
ILMN_30163	HIST1H4H	chr6	rs12176317	2.59224e-05
ILMN_30163	HIST1H4H	chr6	rs9379859	2.59224e-05
ILMN_26827	BCNP1	chr19	rs4524058	2.59669e-05
ILMN_5295	FTCD	chr21	rs2839133	2.63098e-05
ILMN_15014	IGSF3	chr1	rs10924103	2.63681e-05
ILMN_29766	C12orf44	chr12	rs3825221	2.64647e-05
ILMN_10100	RPS6KC1	chr1	rs11120063	2.66091e-05
ILMN_10100	RPS6KC1	chr1	rs1284851	2.66091e-05
ILMN_4593	HS747E2A	chr22	rs2744465	2.66389e-05
ILMN_8672	CD38	chr4	rs17387271	2.66873e-05
ILMN_12199	CMYA1	chr3	rs9311208	2.69953e-05
ILMN_10478	SPRR3	chr1	rs1410859	2.70994e-05
ILMN_19740	DNAJB1	chr19	rs4808387	2.7527e-05
ILMN_30033	ILDR1	chr3	rs7648041	2.7531e-05
ILMN_5455	CNTN6	chr3	rs6786142	2.76922e-05
ILMN_29638	GTF3C1	chr16	rs3024536	2.7775e-05
ILMN_22195	LST1	chr6	rs2523710	2.81223e-05
ILMN_23792	C6orf117	chr6	rs2476900	2.82108e-05
ILMN_12926	PARP9	chr3	rs9882797	2.82889e-05
ILMN_10073	FBXW11	chr5	rs6874860	2.85178e-05
ILMN_9209	KRT14	chr17	rs4796588	2.85765e-05
ILMN_9209	KRT14	chr17	rs7208807	2.85765e-05
ILMN_9209	KRT14	chr17	rs4796679	2.85765e-05
ILMN_14614	CYP1B1	chr2	rs2373369	2.8656e-05
ILMN_17221	FAM112B	chr12	rs1691630	2.87703e-05
ILMN_1394	MAN1A1	chr6	rs9372535	2.88624e-05
ILMN_1394	MAN1A1	chr6	rs9401144	2.88624e-05
ILMN_28167	NFKBIE	chr6	rs4711781	2.90651e-05
ILMN_28167	NFKBIE	chr6	rs532492	2.90651e-05
ILMN_5192	IL17D	chr13	rs2987987	2.91045e-05
ILMN_5192	IL17D	chr13	rs2480425	2.91045e-05
ILMN_27144	FLJ22028	chr12	rs1476905	2.91531e-05
ILMN_1649	PDE11A	chr2	rs6755503	2.9237e-05
ILMN_21829	CSMD1	chr8	rs11782360	2.92608e-05
ILMN_15422	PELP1	chr17	rs8076142	2.93127e-05
ILMN_4868	CDK5R1	chr17	rs11650584	2.95151e-05
ILMN_13350	ZNF323	chr6	rs9380064	2.95875e-05
ILMN_137475	CNTNAP2	chr7	rs2041074	2.97508e-05
ILMN_29766	C12orf44	chr12	rs1945295	2.9825e-05
ILMN_15198	GALNT12	chr9	rs12337255	2.98272e-05
ILMN_9752	IFI44L	chr1	rs1780747	2.9841e-05
ILMN_20901	KCNA4	chr11	rs9971536	3.00152e-05
ILMN_25181	GLT1D1	chr12	rs470477	3.03008e-05
ILMN_19472	SUV420H2	chr19	rs8112639	3.03371e-05
ILMN_14646	CDCA7L	chr7	rs1859803	3.05404e-05
ILMN_21964	PIM1	chr6	rs149709	3.07423e-05
ILMN_25103	C3orf63	chr3	rs13089169	3.10633e-05
ILMN_29307	ADAMTS2	chr5	rs4701155	3.10935e-05
ILMN_5192	IL17D	chr13	rs2442452	3.11873e-05
ILMN_13428	PMP2	chr8	rs2081758	3.14604e-05
ILMN_13428	PMP2	chr8	rs890601	3.14604e-05
ILMN_30163	HIST1H4H	chr6	rs9379858	3.16664e-05
ILMN_137208	EGFL8	chr6	rs9267992	3.1682e-05
ILMN_9696	ZBTB5	chr9	rs16934282	3.16941e-05
ILMN_27144	FLJ22028	chr12	rs3782660	3.18143e-05
ILMN_18685	TMEM35	chrX	rs7884209	3.19088e-05
ILMN_137208	EGFL8	chr6	rs3129934	3.19168e-05
ILMN_10771	UBXD1	chr19	rs10853973	3.20333e-05
ILMN_3840	OR3A2	chr17	rs7209989	3.20563e-05
ILMN_3867	IL1RN	chr2	rs6542129	3.21711e-05
ILMN_11793	NUP153	chr6	rs17689501	3.23421e-05
